# Supplementary material for: Microglia–Neutrophil Interactions Drive Dry AMD-like Pathology in a Mouse Model
Source: MDPI journal article supplement (doi:10.3390/cells11223535), 2022-11-09
Supplement: s1 [file s1]

## Supplementary Figure S1

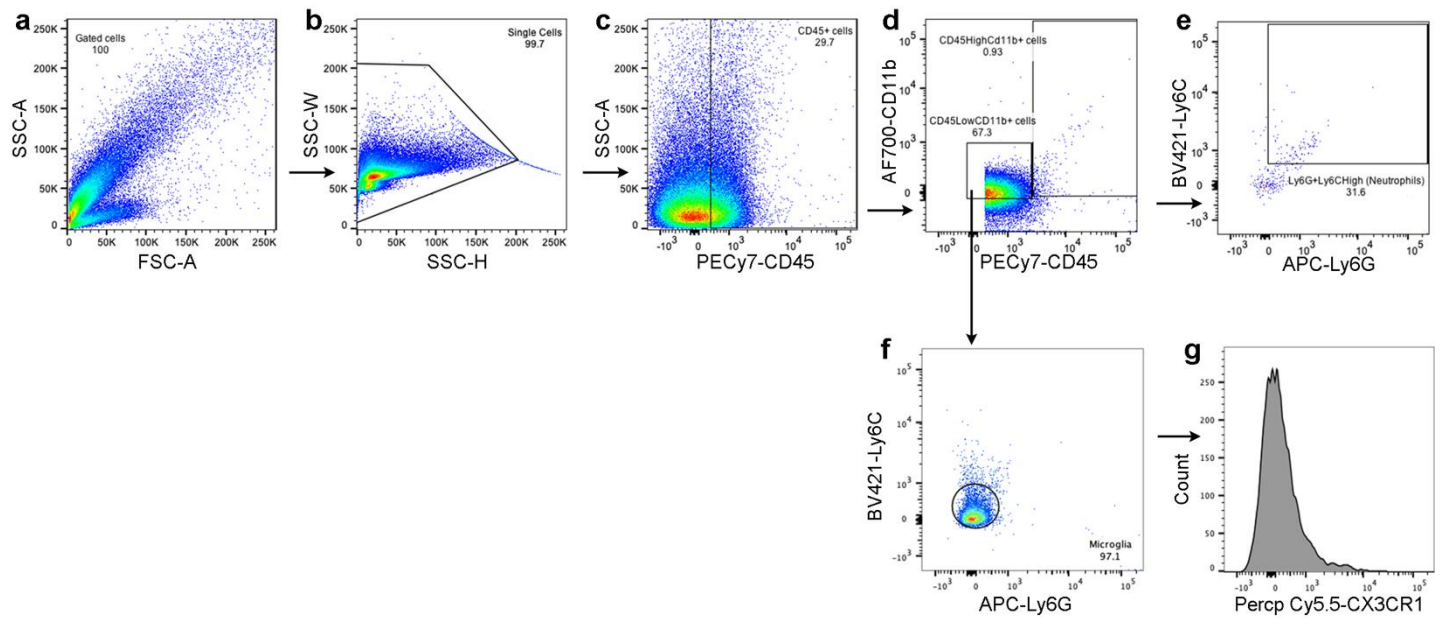

**Figure S1. Gating strategy for immunophenotyping of cells from the subretinal region.** (a-f) Representative dot plots showing gating strategy for CD45<sup>+</sup>CD11b<sup>+</sup> cells from SRS. The CD45<sup>High</sup>CD11b<sup>+</sup> and CD45<sup>Low</sup>CD11b<sup>+</sup> were gated separately (arrows denoting population lineages). The levels of Ly6C and Ly6G on the CD45<sup>High</sup>CD11b<sup>+</sup> population were assessed to evaluate the percentage of neutrophils (CD45<sup>High</sup>CD11b<sup>+</sup>Ly6C<sup>High</sup>Ly6G<sup>+</sup> cells) and microglia (CD45<sup>Low</sup>CD11b<sup>+</sup>Ly6C<sup>Low</sup>Ly6G<sup>+</sup> cells). The expression of CX3CR1 was evaluated among the microglia population (g).

## Supplementary Figure 2

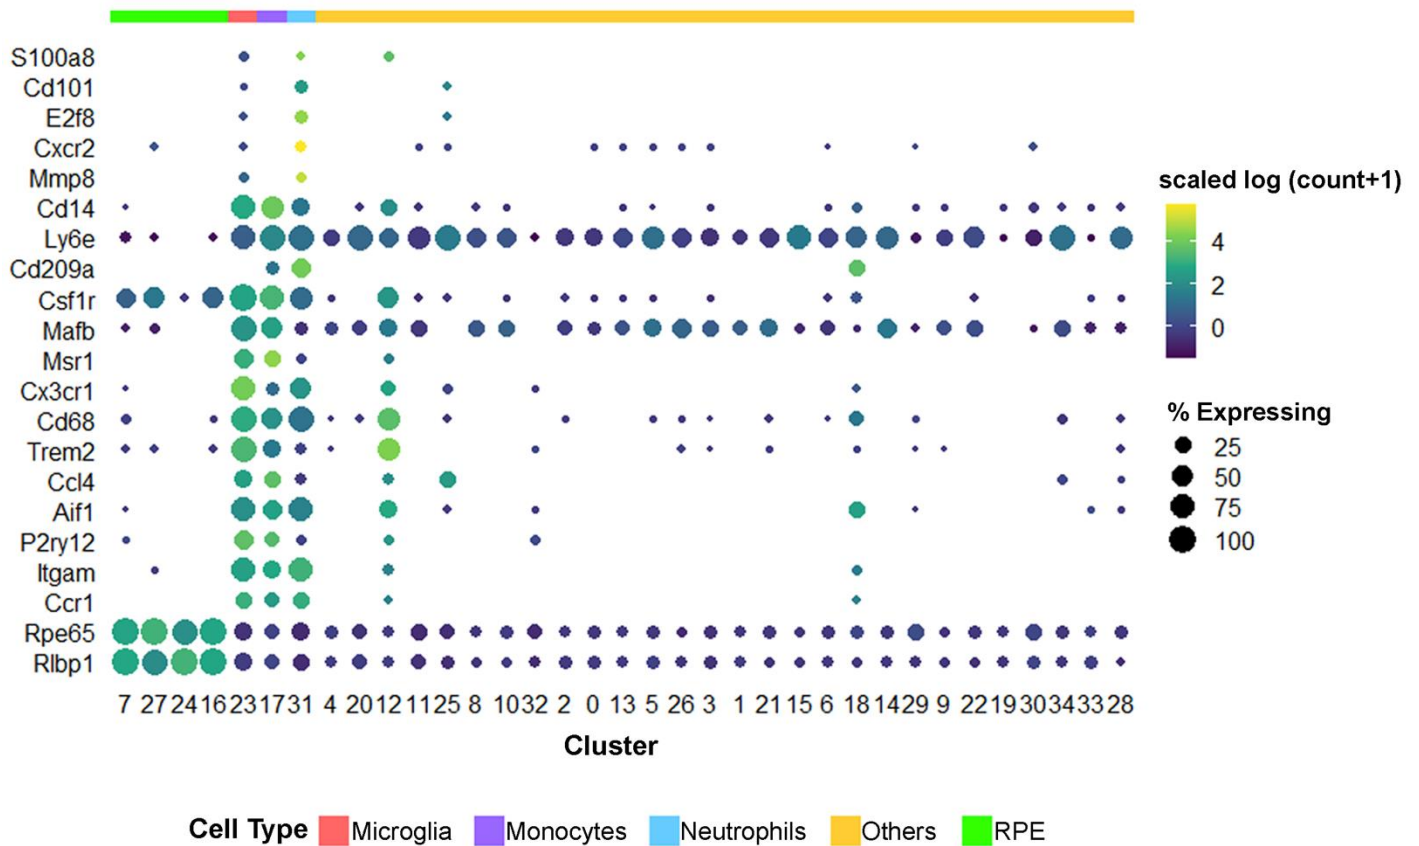

**Figure S2. Cell type identification from scRNAseq analysis.** Dot plot showing expression profiles for specific marker genes for RPE (Green), monocytes (Purple), neutrophils (Cyan) and microglia (Red) in the 35 clusters identified from scRNAseq data of the sub-retinal region from *Cryba1* cKO mice (3 and 15 month data integrated). N = 3.

### Supplementary Figure 3

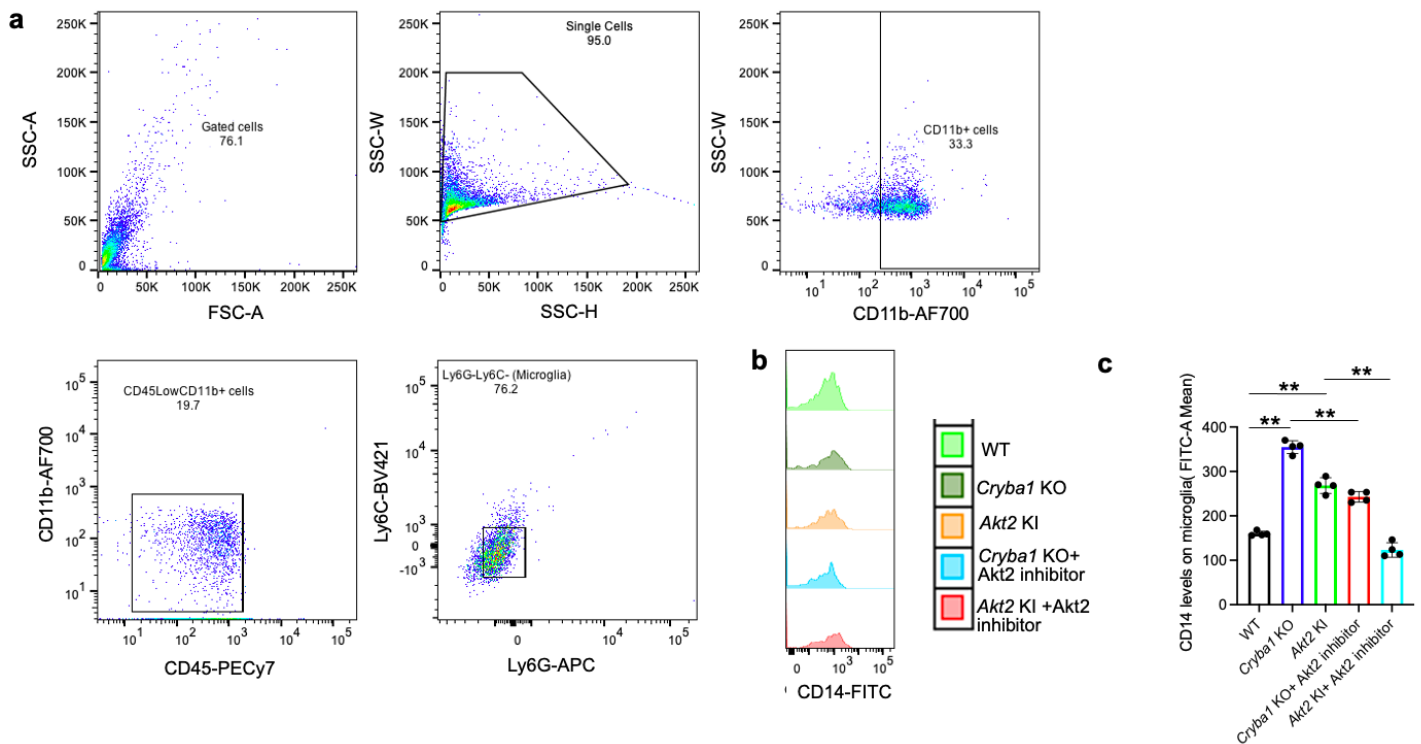

**Figure S3. Akt2 inhibition downregulates CD14 expression on microglia.** (a) Representative dot plots showing the gating strategy for CD45<sup>+</sup>CD11b<sup>+</sup> cells from mouse microglia culture. The CD45<sup>Low</sup>CD11b<sup>+</sup> were gated and the level of Ly6C and Ly6G among CD45<sup>Low</sup>CD11b<sup>+</sup> cell population was assessed to identify microglia (CD45<sup>Low</sup>CD11b<sup>+</sup>Ly6C<sup>+</sup>Ly6G<sup>+</sup>). The levels of CD14 (FITC-A Mean) were evaluated. (b) Flow cytometric fluorescence plot and (c) graph showing increased expression of CD14 (FITC-A Mean) in microglia treated with RPESM from *Cryba1* KO or *Akt2* KI mice compared to WT RPESM treated cells, which was rescued upon Akt2 inhibition in the microglial cells. n = 4. \* P < 0.05, \*\* P < 0.01.

## Supplementary Figure 4

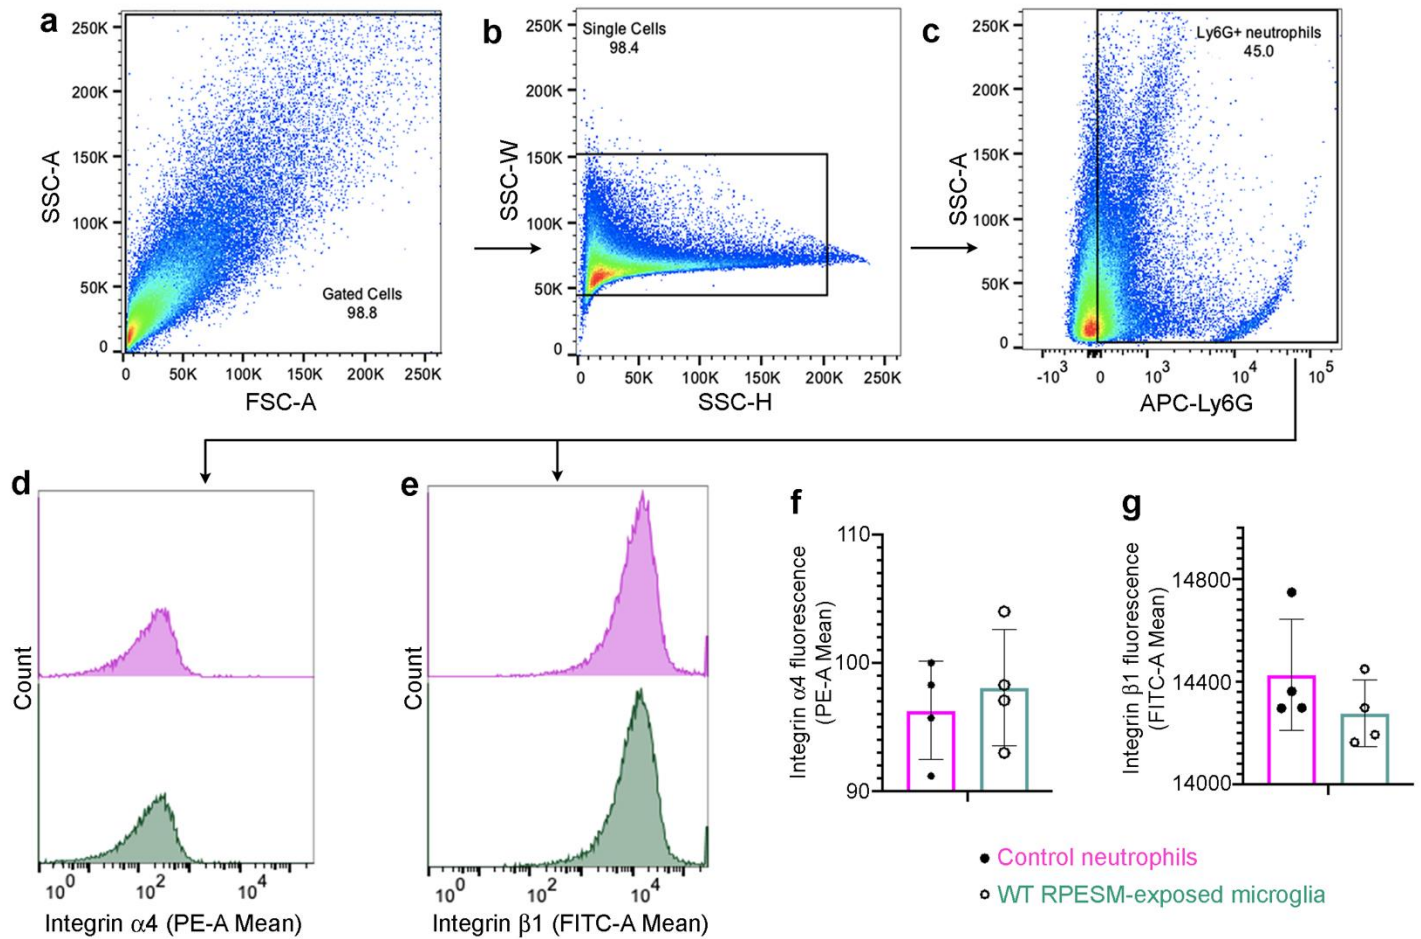

**Figure S4. Integrins  $\alpha 4$  and  $\beta 1$  expression on neutrophils.** (a-c) Representative dot plots showing the gating strategy for cultured neutrophils +/- co-culturing with microglia. (d-g) The integrin  $\alpha 4$  (PE-A Mean) and  $\beta 1$  (FITC-A Mean) levels were evaluated among Ly6G+ cells in untreated (control) and in neutrophils co-cultured with WT RPESM-exposed microglia, which showed no significant difference. n = 4.
