# Supplementary figures and images for: Microglia–Neutrophil Interactions Drive Dry AMD-like Pathology in a Mouse Model
Source: MDPI journal article supplement (doi:10.3390/cells11223535), 2022-11-09

**Supplementary Information: Figure 4b uncropped blot**

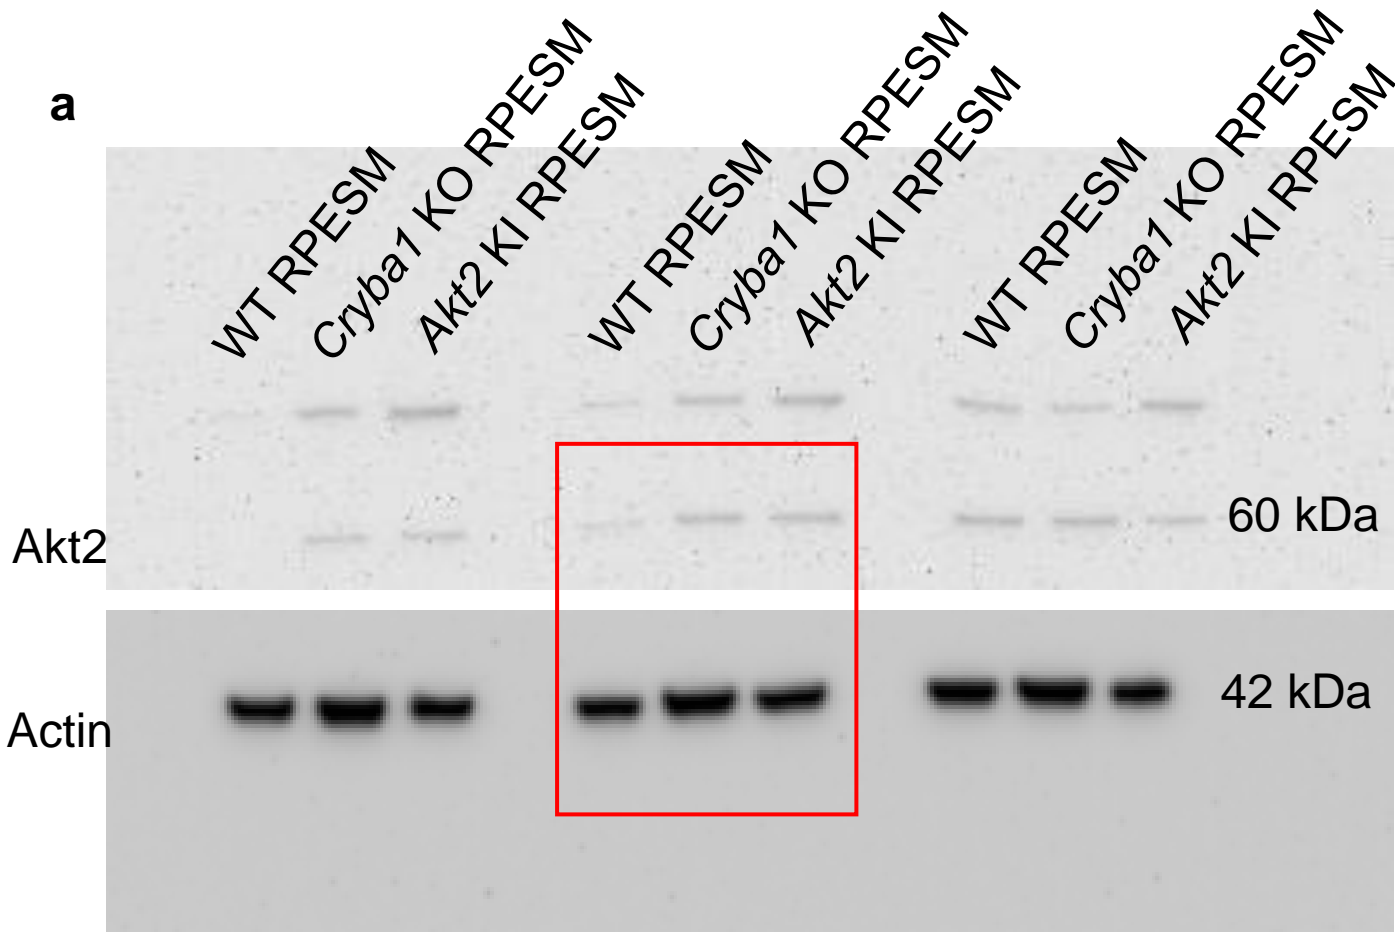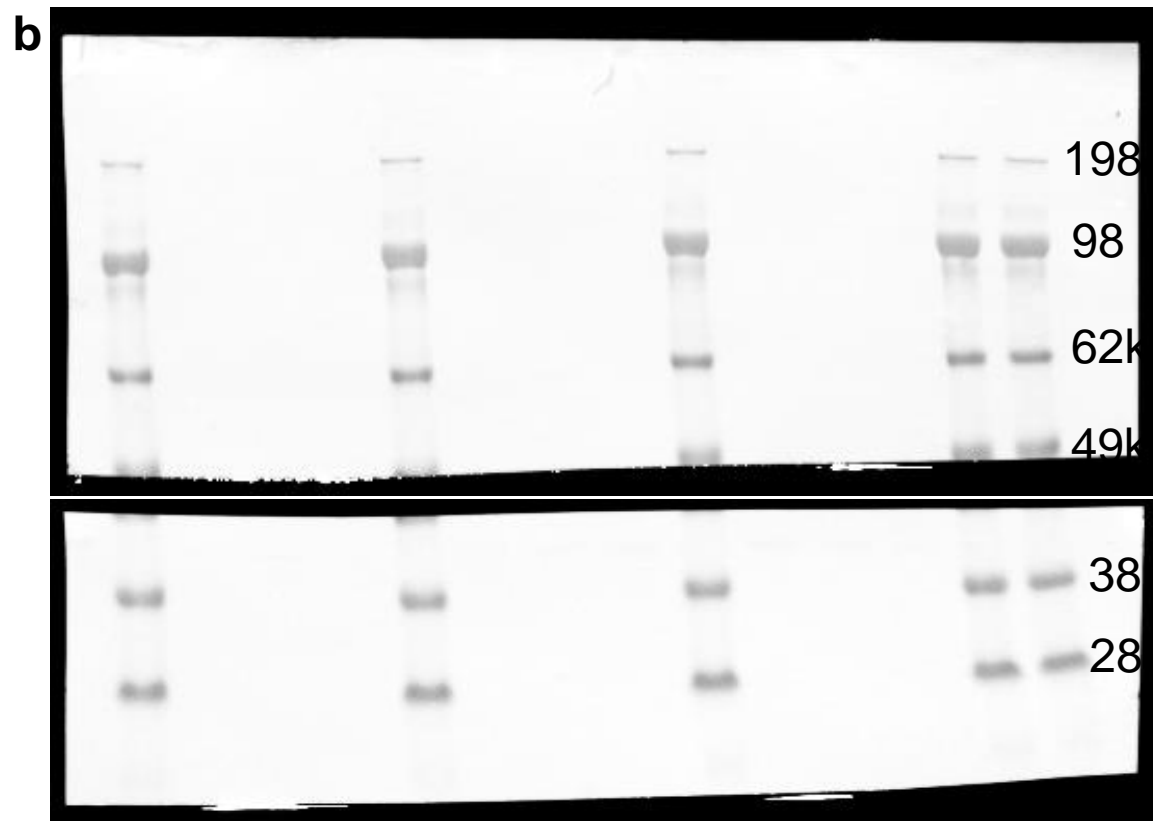

Supplement: s1 [file s1]
